# Supplementary material for: Analysis of Functional Layout in Emergency Departments (ED). Shedding Light on the Free Standing Emergency Department (FSED) Model
Source: MDPI journal article supplement (doi:10.3390/app12105099), 2022-05-18
Supplement: s1 [file s1]

**Table S2.** Full analysis of case studies.

[illegible]
