# Supplementary material for: Analysis of Functional Layout in Emergency Departments (ED). Shedding Light on the Free Standing Emergency Department (FSED) Model
Source: MDPI journal article supplement (doi:10.3390/app12105099), 2022-05-18
Supplement: s1 [file s1]

**Table S1.** Full list of papers collected.

| N  | Authors                                                                       | Title                                                                                                                                                                              | Year | Journal                                                                                         | Main location            | doi/url                                                                                                                                                                                                                                                                                                                                                               | Type             |
|----|-------------------------------------------------------------------------------|------------------------------------------------------------------------------------------------------------------------------------------------------------------------------------|------|-------------------------------------------------------------------------------------------------|--------------------------|-----------------------------------------------------------------------------------------------------------------------------------------------------------------------------------------------------------------------------------------------------------------------------------------------------------------------------------------------------------------------|------------------|
| 1  | Bąkowski, J                                                                   | Several notes on differences between American and European model of an emergency department. An architect's point of view.                                                         | 2014 | Conference: 1st Annual International Conference Health And Medical Sciences                     | USA                      | <a href="https://www.researchgate.net/publication/285863899_Several_notes_on_differences_between_American_and_European_model_of_an_emergency_department_An_architect's_point_of_view">https://www.researchgate.net/publication/285863899_Several_notes_on_differences_between_American_and_European_model_of_an_emergency_department_An_architect's_point_of_view</a> | conference paper |
| 2  | Buffoli M, Bellini E, Dell'Ovo M, Gola M, Nachiero D, Rebecchi A, Capolongo S | Humanisation and soft qualities in emergency rooms                                                                                                                                 | 2016 | Annali di Igine                                                                                 | Italy                    | 10.4415/ANN_16_01_09                                                                                                                                                                                                                                                                                                                                                  | Article          |
| 3  | Lukens, J                                                                     | Freestanding Emergency Departments: An Alternative Model for Rural Communities.                                                                                                    | 2016 | Rural Health Information Hub                                                                    | USA                      | <a href="https://www.ruralhealthinfo.org/rural-monitor/freestanding-emergency-departments/">https://www.ruralhealthinfo.org/rural-monitor/freestanding-emergency-departments/</a>                                                                                                                                                                                     | web article      |
| 4  | Ayers AA                                                                      | Understanding the Free Standing Emergency Department Phenominon.                                                                                                                   | 2016 | The Journal of Urgent Care Medicine                                                             | USA                      | <a href="https://www.jucm.com/understanding-the-freestanding-emergency-department-phenomenon/">https://www.jucm.com/understanding-the-freestanding-emergency-department-phenomenon/</a>                                                                                                                                                                               | web article      |
| 5  | Schuur, JD; Baker, O; Freshman, J; Wilson, M & Cutler, DM                     | Where Do Freestanding Emergency Departments Choose to Locate? A National Inventory and Geographic Analysis in Three States.                                                        | 2016 | Annals of Emergency Medicine                                                                    | USA                      | 10.1016/j.annemergmed.2016.05.019                                                                                                                                                                                                                                                                                                                                     | article          |
| 6  | Rismanchian F, Lee HY                                                         | Process Mining-Based Method of Designing and Optimizing the Layouts of Emergency Departments in Hospitals                                                                          | 2016 | HERD                                                                                            | South Korea              | 10.1177/1937586716674471                                                                                                                                                                                                                                                                                                                                              | Article          |
| 7  | Frascio, M; Mandolino, F; Zomparelli, F & Petrillo, A                         | A Cognitive Model for Emergency Management in Hospitals: Proposal of a Triage Severity Index.                                                                                      | 2017 | Theory and Application on Cognitive Factors and Risk Management                                 | Italy                    | 10.5772/intechopen.68144                                                                                                                                                                                                                                                                                                                                              | book chapter     |
| 8  | Brunelle, A; Henes, M; Hu, A; Kosovrasti, K; Lambert, B; Tavera, A            | Freestanding Emergency Departments (FSEDs) – A Stakeholder Study.                                                                                                                  | 2017 | Report - Exploring the Feasibility of Freestanding Emergency Departments in Ware, Massachusetts | USA                      | <a href="https://web.wpi.edu/Pubs/E-project/Available/E-project-050117-123753/unrestricted/Freestanding_Emergency_Department_A_Stakeholder_Study.pdf">https://web.wpi.edu/Pubs/E-project/Available/E-project-050117-123753/unrestricted/Freestanding_Emergency_Department_A_Stakeholder_Study.pdf</a>                                                                 | Report           |
| 9  | Langlands B, Coleman D, Savage T                                              | Reimagining the ED: Ideas for Shaping the Emergency Department of the Future                                                                                                       | 2018 | Facility Guidelines Institute (FGI)                                                             | USA                      | <a href="https://www.fgiguideines.org/wp-content/uploads/2019/02/FGI-Reimagining-the-ED_rev.pdf">https://www.fgiguideines.org/wp-content/uploads/2019/02/FGI-Reimagining-the-ED_rev.pdf</a>                                                                                                                                                                           | Report           |
| 10 | Hartigan L, Cussen L, Meaney S, O'Donoghue K                                  | Patients' perception of privacy and confidentiality in the emergency department of a busy obstetric unit                                                                           | 2018 | BMC Health Services Research volume                                                             | Ireland                  | 10.1186/s12913-018-3782-6                                                                                                                                                                                                                                                                                                                                             | Article          |
| 11 | Burgess L, Kynoch K, Hines S                                                  | Implementing best practice into the emergency department triage process                                                                                                            | 2019 | International Journal of Evidence Based Healthcare                                              | Australia                | 10.1097/XEB.0000000000000144                                                                                                                                                                                                                                                                                                                                          | Article          |
| 12 | Zamani, Z                                                                     | Effects of Emergency Department Physical Design Elements on Security, Way-finding, Visibility, Privacy, and Efficiency and Its Implications on Staff Satisfaction and Performance. | 2019 | HERD: Health Environments Research & Design Journal                                             | USA                      | 10.1177/1937586718800482                                                                                                                                                                                                                                                                                                                                              | article          |
| 13 | Gharaveis A, Hamilton DK, Shepley M, Pati D, Rodiek S                         | Design suggestions for greater teamwork, communication and security in hospital emergency departments                                                                              | 2019 | Indoor and Built Environment                                                                    | USA                      | 10.1177/1420326X19836209                                                                                                                                                                                                                                                                                                                                              | Article          |
| 14 | Sasanfar S, Bagherpour M, Moatari-Kazerouni A                                 | Improving emergency departments: Simulation-based optimization of patients waiting time and staff allocation in an Iranian hospital                                                | 2020 | International Journal of Healthcare Management                                                  | Iran                     | 10.1080/20479700.2020.1765121                                                                                                                                                                                                                                                                                                                                         | Article          |
| 15 | Ehmann MR, Erin KM., Zakk A, Jordan D, Mustapha S                             | Emergency Department Ergonomic Redesign Improves Team Satisfaction in Cardiopulmonary Resuscitation Delivery: A Simulation-Based Quality Improvement Approach                      | 2020 | Journal for Healthcare Quality                                                                  | USA                      | 10.1097/JHQ.0000000000000244                                                                                                                                                                                                                                                                                                                                          | Article          |
| 16 | Gharaveis A, Pati D, Hamilton DK, Shepley M, Rodiek S, Najarian M             | The Correlation Between Visibility and Medical Staff Collaborative Communication in Emergency Departments                                                                          | 2020 | HERD                                                                                            | USA                      | 10.1177/1937586720921182                                                                                                                                                                                                                                                                                                                                              | Article          |
| 17 | Tindle K, David A, Carlisle S, Faircloth B, Fields JM, Hayden G, Ku B.        | Relationship of the Built Environment on Nursing Communication Patterns in the Emergency Department: A Task Performance and Analysis Time Study                                    | 2020 | Journal of Emergency Nursing                                                                    | USA                      | 10.1016/j.jen.2020.04.005                                                                                                                                                                                                                                                                                                                                             | Article          |
| 18 | Nourazari S, Harding JW, Davis SR, Litvak O, Traub SJ, Sanchez LD             | Are Smaller Emergency Departments More Prone to Volume Variability?                                                                                                                | 2021 | Western Journal of Emergency Medicine                                                           | USA                      | 10.5811/WESTJEM.2021.2.49749                                                                                                                                                                                                                                                                                                                                          | Article          |
| 19 | Chao-Wang Z, Jian Y, Jiatong L,                                               | Generation of hospital emergency department layouts based on generative adversarial networks                                                                                       | 2021 | Journal of Building Engineering                                                                 | China                    | 10.1016/j.jobe.2021.102539                                                                                                                                                                                                                                                                                                                                            | Article          |
| 20 | Douillet D, Saloux T, Ravon P                                                 | Adaptation of ED design layout during the COVID-19 pandemic: a national cross-sectional survey                                                                                     | 2021 | BMJ Emerg Med J                                                                                 | France                   | 10.1136/emmermed-2020-211012                                                                                                                                                                                                                                                                                                                                          | Article          |
| 21 | Jeong C, Jakobsen H C.W.                                                      | Influence of architectural layouts on noise levels in Danish emergency departments                                                                                                 | 2021 | Journal of Building Engineering                                                                 | Denmark                  | 10.1016/j.jobe.2021.102449                                                                                                                                                                                                                                                                                                                                            | Article          |
| 22 | Alowad A, Samaranyake P, Ahsan K, Alidrisi, Karim A                           | Enhancing patient flow in emergency department (ED) using lean strategies-an integrated voice of customer and voice of process perspective                                         | 2021 | Business Process Management Journal                                                             | Saudi Arabia - Australia | 10.1108/BPMJ-11-2019-0457                                                                                                                                                                                                                                                                                                                                             | Article          |
| 23 | Mohammadi Gorji S, Bosch S.J., Valipour S, De Portu G                         | Investigating the Impact of Healthcare Environmental Design on Staff Security: A Systematic Review                                                                                 | 2021 | HERD                                                                                            | USA                      | 10.1177/1937586720921407                                                                                                                                                                                                                                                                                                                                              | Review           |
